# Supplementary material for: A Novel Nomogram based on Hemodynamic Monitoring for Predicting Survival of Patients with Acute Myocardial Infarction: An Analysis Based on the MIMIC-III
Source: Research Square preprint supplement (doi:10.21203/rs.3.rs-4198976/v1), 2024-04-10
Supplement: Supplementary file 1 [file 79b457e198085480c5d8bb94.docx]

**Table S1 Predictor variables selected by LASSO.**

| Variables | Coefficients |
| --- | --- |
| HR | 0.0050 |
| SBP | -0.0043 |
| CaO2 | . |
| SV | . |
| SVI | . |
| SVR | . |
| SVRI | 0.0050 |
| CO | . |
| CI | . |
| LVSW | -0.0060 |
| LVSWI | . |
| CVP | 0.0495 |
| SO2 | -0.0152 |

CaO2, arterial oxygen content; CI, cardiac index; CO, cardiac output; CVP, central venous pressure; HR, heart rate; LASSO, least absolute shrinkage and selection operator; LVSW, left ventricular stroke work; LVSWI, left ventricular stroke work index; SBP, systolic blood pressure; SBP, systolic blood pressure; SO2, blood oxygen saturation; SV, stroke volume; SVI, stroke volume index; SVR, systemic vascular resistance; SVRI, systemic vascular resistance index;
